# Supplementary material for: How Financial Incentives Increase Smoking Cessation: A Two-Level Path Analysis
Source: PubMed Central journal article supplement (PMC7789935; doi:10.1093/ntr/ntaa024), 2020-01-29
Supplement: ntaa024_suppl_supplementary_file_1.pdf [file ntaa024_suppl_supplementary_file_1.pdf]

Supplementary file 1: Questions to evaluate the smoking cessation training programme

The following statements are about the stop-smoking group training. Indicate to what extent you agree with the following statements:

Response categories:

(1) Completely disagree (2) Disagree (3) Don't disagree/don't agree (4) Agree (5) Completely agree  
(6) Don't know

\* Items f and g were reverse scored.

- a. I found the program interesting
- b. I found the program educational
- c. I found the program clear
- d. I liked the program
- e. I have received sufficient information about quitting smoking
- f. Participating in the program took me a lot of effort\*
- g. Participating in the program took a lot of time\*
- h. I thought the total duration of the program was good
- i. The program has met my needs
- j. I will recommend participating in the training if someone asks me to do so
- k. I am satisfied with the quality of the program
- l. I am satisfied with the type of help I have received through the program
- m. Communication between my coach and me during the program went well

What rating would you give the stop-smoking group training?

1    2    3    4    5    6    7    8    9    10
